# Supplementary material
Source: PubMed Central journal article supplement (PMC4486037)
Supplement: 112supmat-10-1055-s-0034-1390750.pdf [file 112supmat-10-1055-s-0034-1390750.pdf]

**Survey questionnaire:**

**1. Your GI practice is at**

- Your GI practice is at University hospital       Community hospital
- Both settings       Veterans Administration hospital

**2. Your age group (years)**

- Your age group (years) 30 – 40       51 – 60       71 and above
- 41 – 50       61 – 70

**3. Duration of GI practice (in years)**

- Duration of GI practice (in years) < 5       11 – 15
- 5 – 10       >15

**4. Which endoscopic procedures do you routinely perform?**

**IF YOU DO NOT PERFORM ANY GI ENDOSCOPIC PROCEDURES YOUR SURVEY ENDS HERE**

- Which endoscopic procedures do you routinely perform?       ERCP
- Colonoscopy       EUS
- PEG placement       None

**IF YOU DO NOT PERFORM ANY GI ENDOSCOPIC PROCEDURES YOUR SURVEY ENDS HERE  
EGD**

**5. Average number of PERSONALLY PERFORMED GI endoscopic procedures (all) per week**

- 10 – 20                                       31- 40
- 21- 30                                       >40

FOLLOWING QUESTIONS PERTAIN TO USE OF ANTI-PLATELET AGENTS AND GI ENDOSCOPIC PROCEDURES IN PATIENTS WITHOUT BLEEDING DISORDER (normal platelet count and no coagulopathy)

**6. My decision to continue or hold anti-platelet agents prior to elective GI procedures is affected by:**

- My decision to continue or hold anti-platelet agents prior to elective GI procedures is affected by: Setting (hospital vs. ambulatory)
- Patient factors eg. previous ischemic event, GI bleed
- My own experience
- I follow ASGE guidelines for certain high risk procedures only
- I strictly follow ASGE guidelines and keep myself updated by attending postgraduate course or reading published guidelines

Other (please specify)

**7. I hold all ANTI-PLATELET AGENTS prior to any scheduled GI endoscopic procedure**

- I hold all ANTI-PLATELET AGENTS prior to any scheduled GI endoscopic procedure Yes
- No

**8. If YES, I hold following anti-platelet agents for following days prior to all endoscopic procedures**

|              | <b>Hold for 3-5 days</b> | <b>Hold for 5-7 days</b> | <b>Hold for &gt; 7 days</b> |
|--------------|--------------------------|--------------------------|-----------------------------|
| Aspirin      |                          |                          |                             |
| Other NSAIDs |                          |                          |                             |
| Dipyridamole |                          |                          |                             |
| Clopidogrel  |                          |                          |                             |

**9. I restart anti-platelet agents post endoscopic procedures within so many days**

|                             | <b>Do not hold<br/>prior to<br/>procedure</b> | <b>Same day</b> | <b>1-3 days</b> | <b>3 – 5 days</b> | <b>5-7 days</b> |
|-----------------------------|-----------------------------------------------|-----------------|-----------------|-------------------|-----------------|
| Endoscopic<br>biopsy        |                                               |                 |                 |                   |                 |
| Endoscopic<br>polypectomy   |                                               |                 |                 |                   |                 |
| Esophageal<br>dilatation    |                                               |                 |                 |                   |                 |
| ERCP with<br>sphincterotomy |                                               |                 |                 |                   |                 |
| EUS with FNA                |                                               |                 |                 |                   |                 |

**10. I have witnessed ACUTE ISCHEMIC COMPLICATION(S) during or following endoscopic procedure (up to 4 weeks) when following anti-platelet agents WERE HELD prior to endoscopic procedure**

**Yes**

**No**

**Aspirin**

**Dipyridamole**

**Clopidogrel**

**11. I have witnessed SIGNIFICANT GI BLEEDING during or following endoscopic procedure (up to 4 weeks) when following anti-platelet agents were NOT HELD PRIOR TO endoscopic procedure**

**YES**

**NO**

**Aspirin**

**NSAIDs**

**Dipyridamole**

**Clopidogrel**

**IF YOU HOLD ALL ANTI-PLATELET AGENTS PRIOR TO ALL THE ENDOSCOPIC PROCEDURES YOUR SURVEY ENDS HERE, OTHERWISE ANSWER THESE QUESTIONS**

12. I perform following endoscopic procedures while the patient is on any anti-platelet agent(s)

YES

NO

EGD

Esophageal dilatation

Colonoscopy diagnostic only

Colonoscopy with polypectomy

PEG

ERCP

ERCP with sphincterotomy

EUS

EUS with FNA

13. I routinely perform following GI endoscopic procedures while patients are on following anti-platelet agents:

|                              | On aspirin/NSAIDS | On aspirin + dipyridamole | On either aspirin or clopidogrel | On clopidogrel and aspirin/NSAIDS |
|------------------------------|-------------------|---------------------------|----------------------------------|-----------------------------------|
| EGD + biopsy                 |                   |                           |                                  |                                   |
| EGD + polypectomy            |                   |                           |                                  |                                   |
| Colonoscopy + biopsy         |                   |                           |                                  |                                   |
| Colonoscopy with polypectomy |                   |                           |                                  |                                   |
| Esophageal dilatation        |                   |                           |                                  |                                   |
| PEG tube placement           |                   |                           |                                  |                                   |
| ERCP with sphincterotomy     |                   |                           |                                  |                                   |
| EUS with FNA                 |                   |                           |                                  |                                   |

14. In patients on anti-platelets, I routinely perform prophylactic clipping following polypectomy

YES

NO
